# Supplementary material
Source: PubMed Central journal article supplement (PMC8116382)
Supplement: 13280_2020_1491_MOESM1_ESM.pdf [file 13280_2020_1491_MOESM1_ESM.pdf]

***Ambio***

Electronic Supplementary Material

*This supplementary material has not been peer reviewed.*

**Title: Psychosocial drivers of land management behaviour: how threats, norms, and context influence deforestation intentions**

**Table S1.** Description of the survey items used for analysis. Unless otherwise stated, items on a 1 to 6 scale represent (1 = ‘strongly disagree’ to 6 = ‘strongly agree’). Aggregated variables (attitudes and vulnerability) represent an average score for each survey item.

| Variables                                | Items                                                                                                                                                                                                                                                                                                                                                                                                | Scale                                                                                     |
|------------------------------------------|------------------------------------------------------------------------------------------------------------------------------------------------------------------------------------------------------------------------------------------------------------------------------------------------------------------------------------------------------------------------------------------------------|-------------------------------------------------------------------------------------------|
| <i>Trees Present</i>                     | Are there any trees (including tree regrowth) currently on your property that are not grown or harvested for production purposes?                                                                                                                                                                                                                                                                    | Yes/No                                                                                    |
| <i>Clearing Intentions</i>               | "I intend to engage in tree clearing on my property during the next 6 months."                                                                                                                                                                                                                                                                                                                       | (1, 6)                                                                                    |
| <i>Attitudes</i>                         |                                                                                                                                                                                                                                                                                                                                                                                                      |                                                                                           |
| Pro-clearing                             | I am concerned about the rate of tree clearing in Queensland †<br>Tree clearing should be stopped †<br>People are clearing too many trees †<br>People who clear trees from their property do not care about the environment †                                                                                                                                                                        | (1, 6)                                                                                    |
| Anti-regulation                          | In my opinion, vegetation management regulations...<br>Are a burden to me<br>Are fair to farmers †<br>Are necessary †<br>Should be more strict †                                                                                                                                                                                                                                                     | (1, 6)                                                                                    |
| <i>Social Norms</i>                      |                                                                                                                                                                                                                                                                                                                                                                                                      |                                                                                           |
| Tree clearing                            | Most of the farmers in my community clear trees                                                                                                                                                                                                                                                                                                                                                      | (1, 6)                                                                                    |
| Compliance                               | Most of the farmers in my community follow the vegetation management regulations                                                                                                                                                                                                                                                                                                                     | (1, 6)                                                                                    |
| <i>Perceived Behavioural Control</i>     |                                                                                                                                                                                                                                                                                                                                                                                                      |                                                                                           |
| Controllability                          | How much personal control do you feel you have over tree clearing decisions on your property? ('very little control' to 'complete control')                                                                                                                                                                                                                                                          | (1, 6)                                                                                    |
| Self-efficacy                            | Following the vegetation management regulations set forth by the Queensland Government is... ('extremely difficult' to 'extremely easy')                                                                                                                                                                                                                                                             | (1, 6)                                                                                    |
| <i>Threat Appraisal</i>                  |                                                                                                                                                                                                                                                                                                                                                                                                      |                                                                                           |
| Severity (relative threat of regulation) | To what degree do the following pose a threat to the property you manage?<br>Drought and extreme weather<br>Pest species (e.g. feral cats, pigs, foxes, rabbits)<br>Mining activities<br>Your personal health and well-being<br>Escalating costs of running the business<br>Changing prices for agricultural products<br>Vegetation management regulations<br>Chemical and pesticide use regulations | (-5, 5) ‡<br>(1, 6)<br>(1, 6)<br>(1, 6)<br>(1, 6)<br>(1, 6)<br>(1, 6)<br>(1, 6)<br>(1, 6) |
| Vulnerability                            | I am confident that I can still enjoy a comfortable lifestyle while following vegetation management regulations<br>Vegetation management regulations are a threat to my business or livelihood †                                                                                                                                                                                                     | (1, 6)                                                                                    |
| <i>Coping Appraisal</i>                  |                                                                                                                                                                                                                                                                                                                                                                                                      |                                                                                           |
| Clearing efficacy                        | Clearing trees from my property will not harm the environment †                                                                                                                                                                                                                                                                                                                                      | (1, 6)                                                                                    |
| Regulatory efficacy                      | Vegetation management regulations will not protect the environment †                                                                                                                                                                                                                                                                                                                                 | (1, 6)                                                                                    |
| Self-efficacy                            | Following the vegetation management regulations set forth by the Queensland Government is... ('extremely difficult' to 'extremely easy')                                                                                                                                                                                                                                                             | (1, 6)                                                                                    |
| <i>Contextual Factors</i>                |                                                                                                                                                                                                                                                                                                                                                                                                      |                                                                                           |
| Social capital                           | Are you an active member of a local community group, organisation, or club (e.g. sport, craft, social club)?                                                                                                                                                                                                                                                                                         | (1, 4)*                                                                                   |
| Policy uncertainty                       | To what extent do talks of new clearing regulations in Parliament influence how you make tree clearing decisions on your property?                                                                                                                                                                                                                                                                   | (1, 6)                                                                                    |
| Years managing property                  | Approximately how many years have you managed your current farm or other grazing or production properties?                                                                                                                                                                                                                                                                                           | (1, 6)                                                                                    |
| <i>Demographics</i>                      |                                                                                                                                                                                                                                                                                                                                                                                                      |                                                                                           |
| Survey eligibility                       | Which of the following best describes you?<br>Manager<br>I manage a farm or other grazing or production property<br>Non-manager<br>I have a family member who manages a farm or other grazing or production property<br>I interact with farmers or graziers for my work                                                                                                                              |                                                                                           |
| Primary decision-maker                   | Are you primarily responsible for making management decisions on this property?                                                                                                                                                                                                                                                                                                                      |                                                                                           |
| Education                                | What is the highest level of education you have completed?<br>Did not complete high school<br>High school<br>Diploma or TAFE/Technical Certificate<br>Bachelor Degree<br>Post-Graduate Degree                                                                                                                                                                                                        |                                                                                           |
| Income                                   | The average person in Queensland has a total personal income of \$40,000 to \$50,000 per year. Is your personal income above, below or roughly equal to this average?<br>Below this average<br>Equal to this average                                                                                                                                                                                 |                                                                                           |

Above this average

---

Postcode (residence)

What is the postcode at your main place of residence?

---

† Scores reversed for analysis

‡ Scale of the generated single score differs from items' scale; see main text for calculation

\* Scale represents 1 = 'never a member,' 2 = 'no longer a member,' 3 = 'a member but not actively involved,' 4 = 'very actively involved'

**Table S2.** Comparison of the demographic, psychosocial, and clearing characteristics between the entire sample, weak intenders (intentions  $\leq 3$ ), and strong intenders (intentions  $\geq 4$ ). Continuous variables are represented as *mean (SD)* and categorical variables are represented as % (*number of participants*).

| <b>Variable</b>                      | <b>Sample</b> | <b>Weak intenders</b> | <b>Strong intenders</b> |
|--------------------------------------|---------------|-----------------------|-------------------------|
| <i>Clearing intentions</i>           | 2.85 (1.89)   | 1.56 (0.80)           | 5.09 (0.87)             |
| <i>Attitudes</i>                     |               |                       |                         |
| Pro-clearing                         | 4.63 (1.28)   | 4.54 (1.36)           | 4.78 (1.11)             |
| Anti-regulations                     | 4.60 (1.08)   | 4.46 (1.15)           | 4.86 (0.91)             |
| <i>Social norms</i>                  |               |                       |                         |
| Tree clearing                        | 3.19 (1.71)   | 2.94 (1.76)           | 3.63 (1.53)             |
| Regulatory compliance                | 4.61 (1.31)   | 4.47 (1.36)           | 4.85 (1.19)             |
| <i>Perceived behavioural control</i> |               |                       |                         |
| Controllability                      | 2.66 (1.67)   | 2.85 (1.72)           | 2.34 (1.52)             |
| Self-efficacy                        | 2.16 (1.17)   | 2.28 (1.22)           | 1.97 (1.05)             |
| <i>Threat appraisal</i>              |               |                       |                         |
| Severity                             | 0.54 (1.35)   | 0.30 (1.47)           | 0.96 (0.98)             |
| Vulnerability                        | 3.97 (1.47)   | 3.77 (1.46)           | 4.32 (1.43)             |
| <i>Coping appraisal</i>              |               |                       |                         |
| Clearing efficacy                    | 3.30 (1.78)   | 3.44 (1.76)           | 3.05 (1.79)             |
| Regulatory efficacy                  | 3.57 (1.76)   | 3.78 (1.78)           | 3.20 (1.68)             |
| Self-efficacy                        | 2.16 (1.17)   | 2.28 (1.22)           | 1.97 (1.05)             |
| <i>Social capital</i>                | 2.76 (1.26)   | 2.57 (1.25)           | 3.08 (1.23)             |
| <i>Policy uncertainty</i>            | 2.53 (1.90)   | 1.98 (1.65)           | 3.50 (1.94)             |
| <i>Years managing property</i>       | 30.1 (17.1)   | 32.0 (17.3)           | 26.8 (16.4)             |
| <i>Demographics</i>                  |               |                       |                         |
| Age                                  | 59.2 (13.5)   | 61.7 (13.4)           | 54.9 (12.8)             |
| Gender                               |               |                       |                         |
| Male                                 | 76.7% (135)   | 73.2% (82)            | 82.8% (53)              |
| Female                               | 23.3% (41)    | 26.8% (30)            | 17.2% (11)              |
| Education                            |               |                       |                         |
| High school                          | 52.8% (93)    | 55.4% (62)            | 48.4% (31)              |
| Tertiary (e.g. TAFE, University)     | 47.2% (83)    | 44.6% (50)            | 51.6% (33)              |
| Income                               |               |                       |                         |
| Less than \$50,000                   | 29.5% (52)    | 33.0% (37)            | 23.4% (15)              |
| Equal to \$50,000                    | 29.5% (52)    | 27.7% (31)            | 32.8% (21)              |
| More than \$50,000                   | 40.9% (72)    | 39.3% (44)            | 43.8% (28)              |
| Sample size                          | 176           | 112                   | 64                      |

**Table S3.** Estimates of the variable inflation factors (VIF) for each behavioural model.

| <b>Model</b>                              | <b>Variable</b>               | <b>VIF</b> |
|-------------------------------------------|-------------------------------|------------|
| Theory of Planned Behaviour (clearing)    | Age                           | 1.818      |
|                                           | Gender (female)               | 1.047      |
|                                           | Attitudes – Pro-clearing      | 1.185      |
|                                           | Norms – Tree clearing         | 1.038      |
|                                           | PBC – Controllability         | 1.255      |
|                                           | Social capital                | 1.065      |
|                                           | Policy uncertainty            | 1.146      |
|                                           | Years managing property       | 1.709      |
| Theory of Planned Behaviour (regulations) | Age                           | 1.916      |
|                                           | Gender (female)               | 1.061      |
|                                           | Attitudes – Anti-regulation   | 1.302      |
|                                           | Norms – Regulatory compliance | 1.048      |
|                                           | PBC – Self-efficacy           | 1.310      |
|                                           | Social capital                | 1.077      |
|                                           | Policy uncertainty            | 1.136      |
|                                           | Years managing property       | 1.811      |
| Protection Motivation Theory              | Age                           | 1.818      |
|                                           | Gender (female)               | 1.147      |
|                                           | Threat – Severity             | 1.377      |
|                                           | Threat – Vulnerability        | 1.535      |
|                                           | Coping – Self-efficacy        | 1.526      |
|                                           | Coping – Clearing efficacy    | 1.068      |
|                                           | Coping – Regulatory efficacy  | 1.234      |
|                                           | Social capital                | 1.078      |
|                                           | Policy uncertainty            | 1.160      |
| Years managing property                   | 1.757                         |            |
| Integrated model                          | Age                           | 1.748      |
|                                           | Gender (female)               | 1.154      |
|                                           | Attitudes – Pro-clearing      | 2.121      |
|                                           | Norms – Tree clearing         | 1.163      |
|                                           | Attitudes – Anti-regulation   | 2.102      |
|                                           | Norms – Regulatory compliance | 1.227      |
|                                           | Threat – Severity             | 1.510      |
|                                           | Threat – Vulnerability        | 1.784      |
|                                           | Coping – Regulatory efficacy  | 1.217      |
|                                           | Social capital                | 1.097      |
|                                           | Policy uncertainty            | 1.197      |
|                                           | Years managing property       | 1.662      |
